# Supplementary material
Source: PubMed Central journal article supplement (PMC7930405)
Supplement: ONCO-26-e435-s001.pdf [file ONCO-26-e435-s001.pdf]

Supplemental Table for:  
Expanding beyond maximum grade: Chemotherapy toxicity over time by age and performance status in non-small cell lung cancer (Alliance A151729)  
Melisa L. Wong et al.

**Supplemental Table. CALGB Expanded Common Toxicity Criteria utilized in CALGB**

**9730**

|                   | <b>Grade 1</b>                                  | <b>Grade 2</b>                                                              | <b>Grade 3</b>                                                              | <b>Grade 4</b>                               |
|-------------------|-------------------------------------------------|-----------------------------------------------------------------------------|-----------------------------------------------------------------------------|----------------------------------------------|
| <b>Fatigue</b>    | mild, able to continue normal activities (PS 1) | impairment of normal daily activity or bed rest <50% of waking hours (PS 2) | in bed or in chair >50% of waking hours (PS 3)                              | bed ridden or unable to care for self (PS 4) |
| <b>Neuropathy</b> | mild paresthesias, loss of deep tendon reflexes | mild or moderate objective sensory loss; moderate paresthesias              | severe objective, sensory loss or paresthesias that interfere with function | ---                                          |

Abbreviations: CALGB, The Cancer and Leukemia Group B; PS, performance status.
